# Supplementary material
Source: bioRxiv or medRxiv preprint supplement (https://medrxiv.org/content/medrxiv/early/2022/10/27/2022.10.27.22281604/DC1/embed/media-1.pdf)
Supplement: Supplementary file [file media-1.pdf]

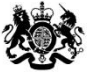

UK Health  
Security  
Agency

26<sup>th</sup> October 2022

UKHSA Research Management & Knowledge Division  
Nobel House 17 Smith Square London SW1P 3HX  
Tel: 01980 612922

Reshania Naidoo  
EY/Oxford Research Lead and Co-Investigator  
50 Rewley Road  
Oxford  
OX12RQ

[www.ukhsa.gov.uk](http://www.ukhsa.gov.uk)  
<https://research.ukhsa.gov.uk/>

Dear Reshania

**Re:** A multistage mixed-methods evaluation of the UKHSA testing response during the COVID-19 pandemic in England

**R&D Ref:** NR0347

Thank you for submitting your study to the Research Support and Governance Office (RSGO) for review by the UKHSA Research Ethics and Governance Group (REGG).

UKHSA REGG approval for your study has been granted. This approval is granted based on the information provided in the REGG application form and accompanying study documentation, and on the understanding that the study is conducted in accordance with the conditions stated in the applicable UKHSA policies and procedures.

Approval is only granted for activities for which a favourable opinion has been given by the UKHSA REGG. All amendments must be submitted to the RSGO. Any change to the status of the project (including changes to the research team) and any change to the project closure date must also be notified to the RSGO.

The UKHSA is currently undertaking the implementation of a research management system and institutional repository. Aligned to this, from 1 September 2020 the UKHSA Open Access policy requires peer-reviewed research outputs to be made available open access. For further information contact [Paul Rudd](#).

If you need any further support or information, please do not hesitate to contact the [UKHSA RSGO](#) quoting the reference number for your study.

Wishing you every success with your study

Yours sincerely,

Dr Elizabeth Coates  
Head of Research Governance  
Research Support and Governance Office
